# Supplementary material for: Capillary force-driven reverse-Tesla valve structure for microfluidic bioassays
Source: Royal Society of Chemistry journal article supplement (doi:10.1039/d4an00601a), 2024-01-01
Supplement: d4an00601a1.pdf [file d4an00601a1.pdf]

## Electronic Supplementary Information (ESI)

### Capillary force-driven reverse-Tesla valve structure for microfluidic bioassays

Cheng Nie<sup>‡a</sup>, Hyorim Jeong<sup>‡b</sup>, Kyung-A Hyun,<sup>c</sup> Sunyoung Park,<sup>ab</sup>  
and Hyo-Il Jung<sup>\*ab</sup>

<sup>a</sup> School of Mechanical Engineering, Yonsei University, 50 Yonsei-ro, Seodaemun-gu, Seoul, 03722, Republic of Korea

<sup>b</sup> TheDABOM Inc., 50 Yonsei-ro, Seodaemun-gu, b.Seoul, 03722, Republic of Korea

<sup>c</sup> Korea Electronics Technology Institute (KETI), 25 Saenari-ro Bundang-gu Seongnam-si Gyeonggi-do, 13509, Republic of Korea

<sup>‡</sup> These authors contributed equally to this work.

\* Corresponding author: School of Mechanical Engineering, Yonsei University, 50 Yonsei-ro, Seodaemun-gu, Seoul 03722, Republic of Korea

E-mail address: uridle7@yonsei.ac.kr (H. I. Jung).

**Figure S1.** Determination of optimal concentration of Triton X-100

**Figure S2.** Determination of mixing ratio of the sample and Triton X-100

**Figure S3.** Absorbance and *p*-NA standard curves

**Figure S4.** Volume of solution at the outlet according to channel length and flow time

**Figure S5.** Absorbance after trypsin reaction according to reaction time

**Figure S6.** Comparison of fluid flows between  $\mu$ -MixMACS chip, GASI chip, and Tesla chip using computational analysis

**Figure S7.** Comparison of (a) mixing concentration and (b) cross-sectional view of the outlet after particle motion between  $\mu$ -MixMACS chip, GASI chip, and Tesla chip using computational analysis

**Formula.** Calculation formula for reaction efficiency (RE)

Detailed information of nucleic acid amplification:

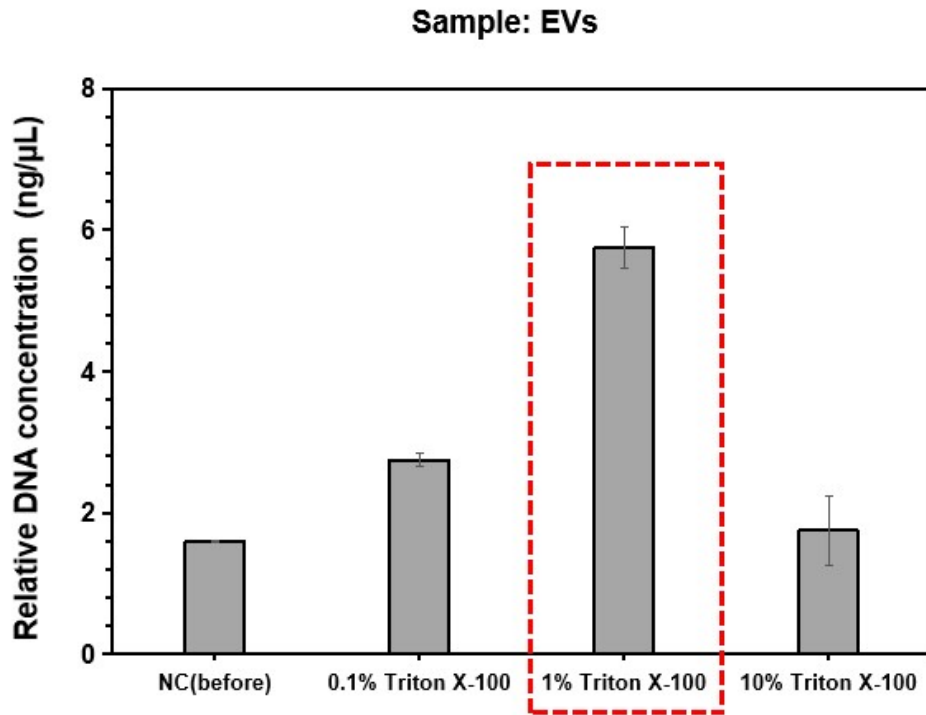

**Figure S1.** Determination of optimal concentration of Triton X-100

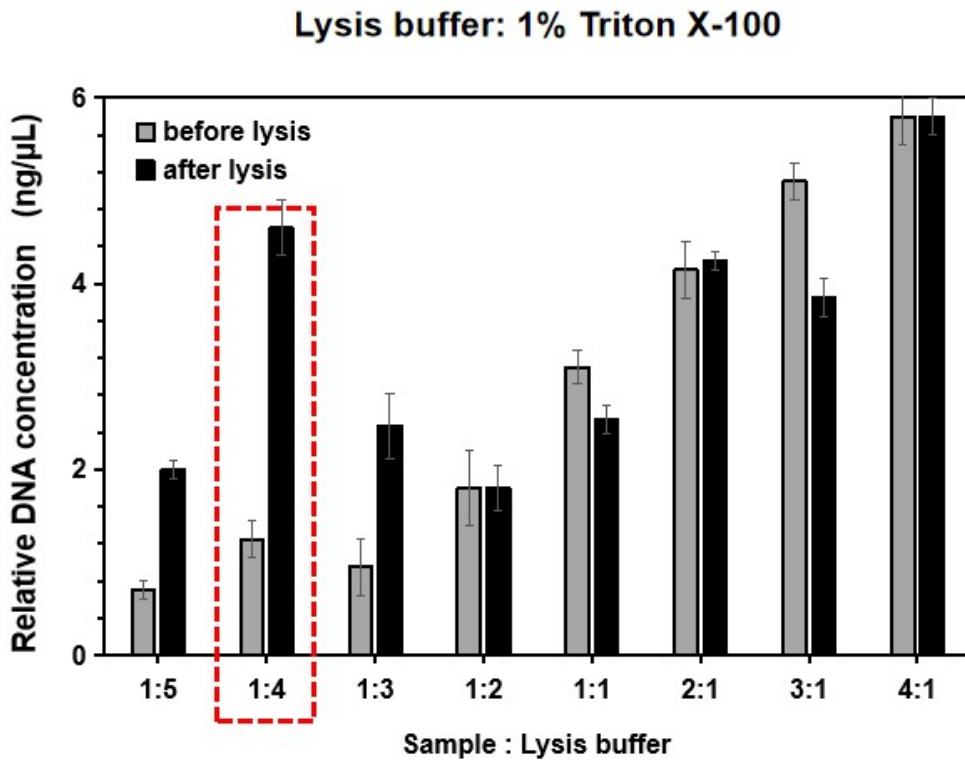

**Figure S2.** Determination of mixing ratio of the sample and Triton X-100

### *p*-NA Standard Curve

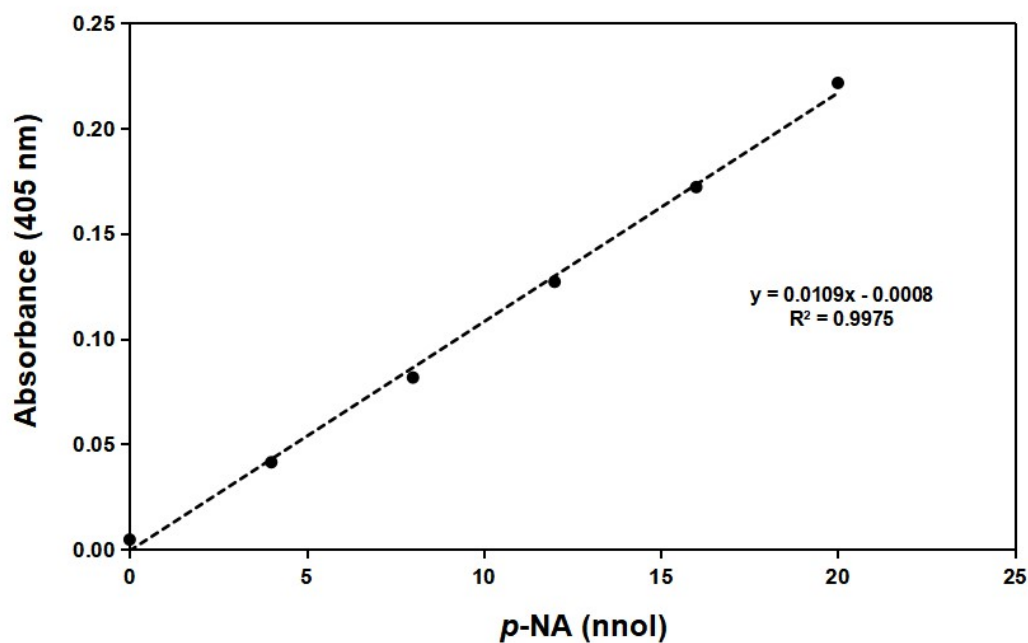

Figure S3. Absorbance and *p*-NA standard curves

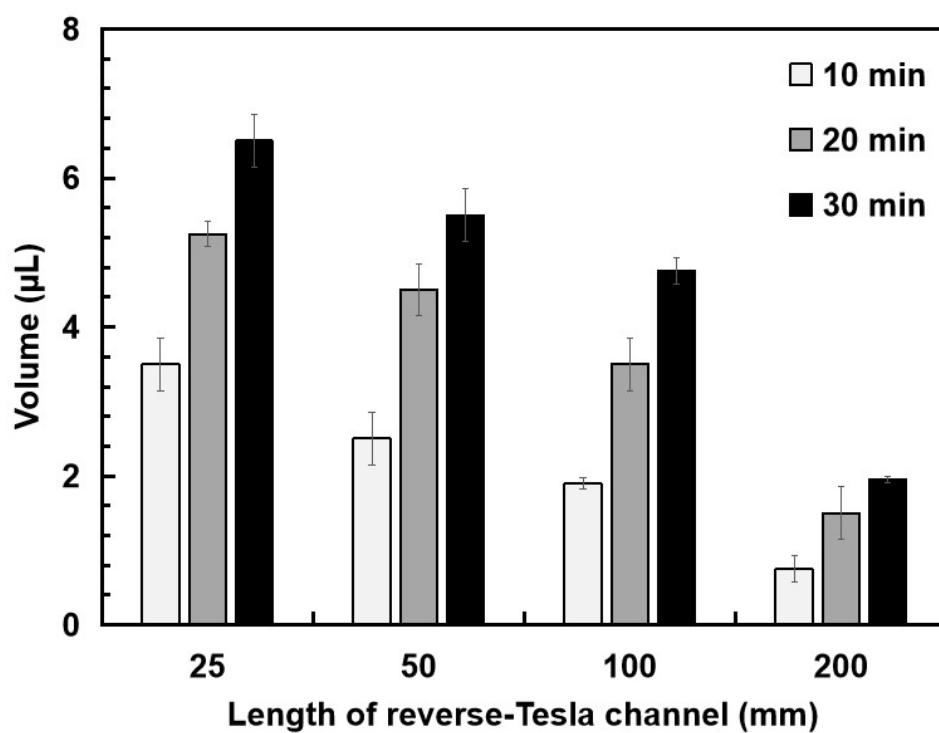

Figure S4. Volume of solution at the outlet according to channel length and flow time

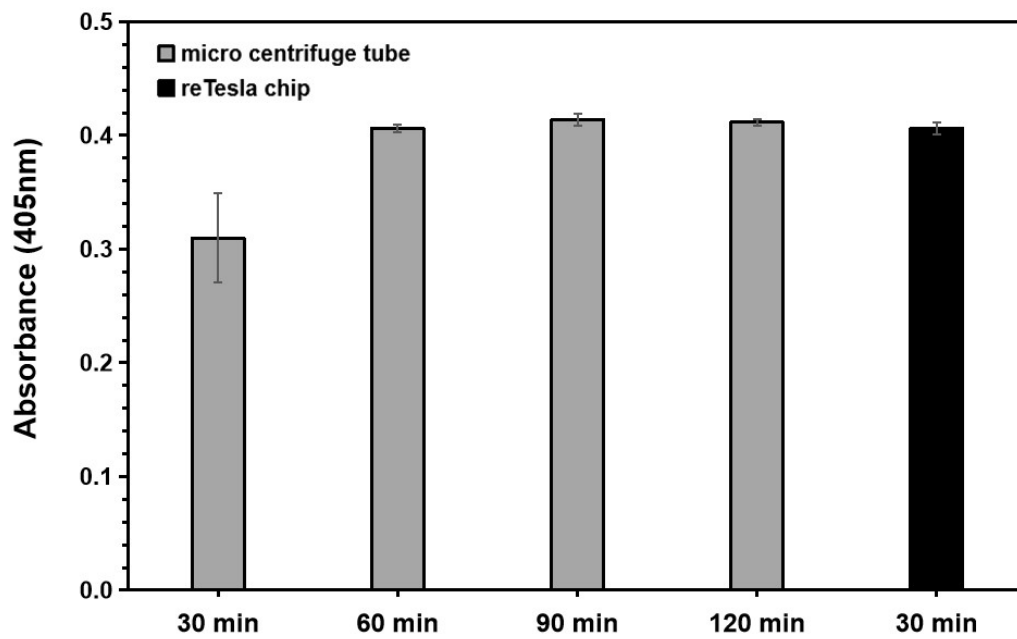

Figure S5. Absorbance after trypsin reaction according to reaction time

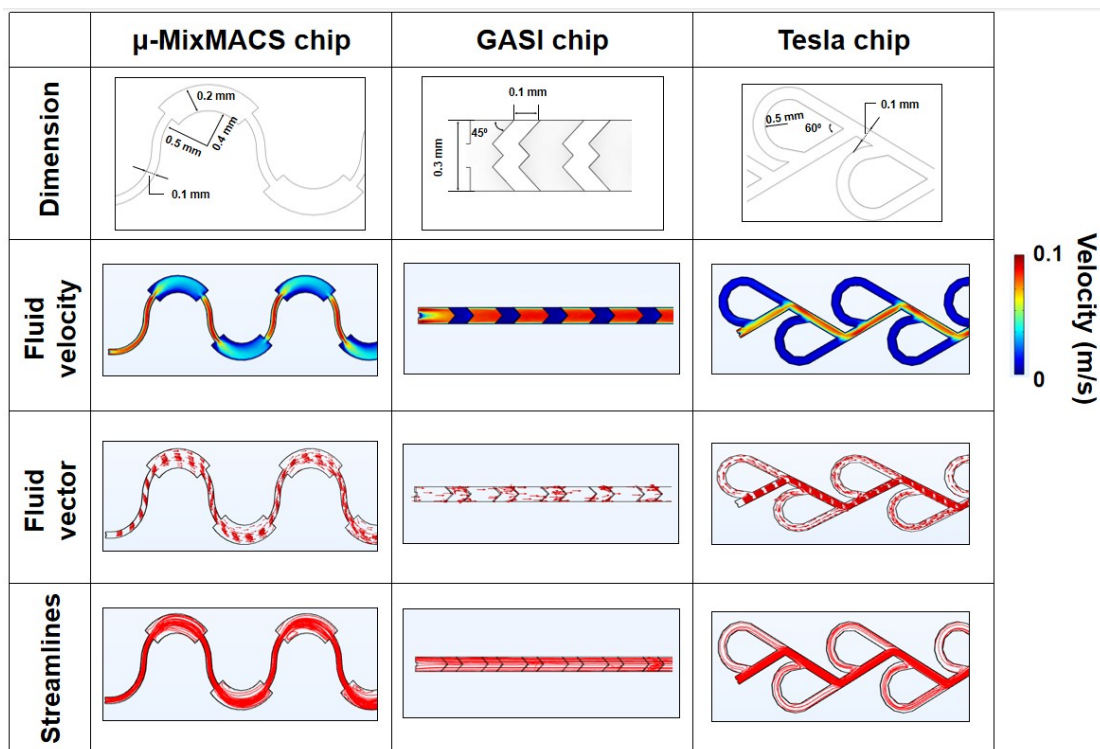

Figure S6. Comparison of fluid flows between μ-MixMACS chip, GASI chip, and Tesla chip using computational analysis

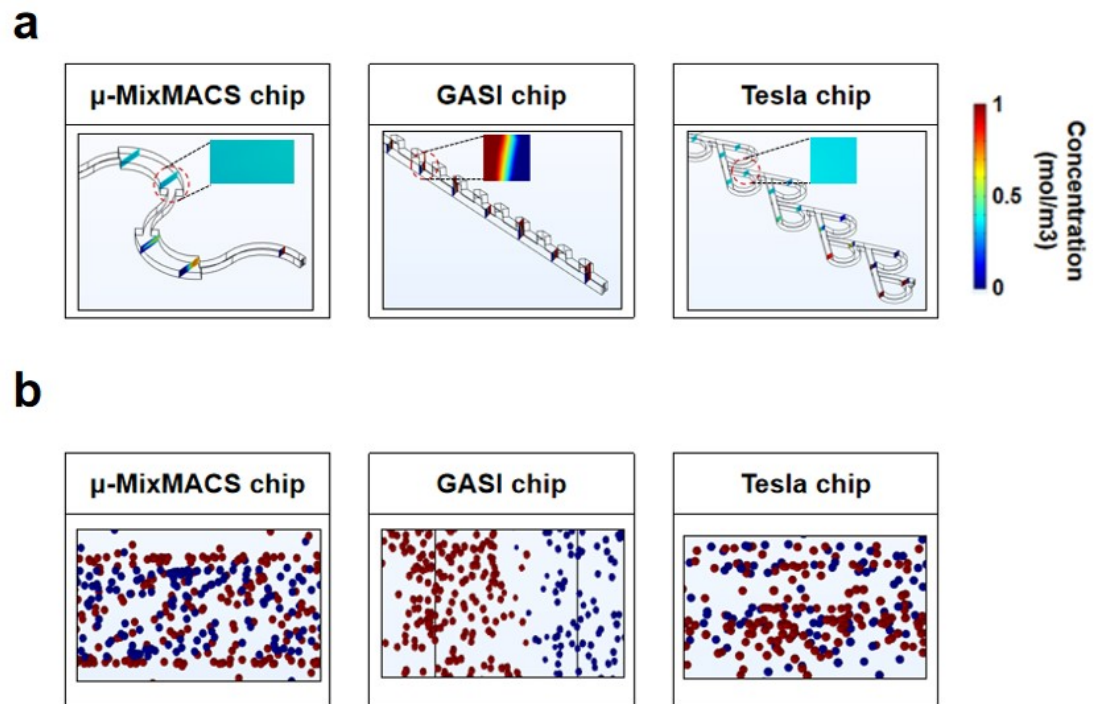

**Figure S7.** Comparison of (a) mixing concentration and (b) cross-sectional view of the outlet after particle motion between  $\mu$ -MixMACS chip, GASI chip, and Tesla chip using computational analysis

**Formula.** Calculation formula for reaction efficiency (RE)

1. The formula for calculating the RE for cell lysis is expressed as follows:

$$RE_{cell\ lysis} = \left(1 - \frac{C_{after}}{C_{before}}\right) \times 100\%$$

where  $C_{before}$  is the sample concentration before cell lysis, and  $C_{after}$  is the sample concentration after cell lysis.

2. The formula for calculating the RE for the proteinase assay is expressed as follows:

$$RE_{proteinase\ assay} = \left(1 - \frac{C_{before}}{C_{after}}\right) \times 100\%$$

where  $C_{before}$  is the *p*-NA content before trypsin cleaves the substrate, and  $C_{after}$  is the *p*-NA content after trypsin cleaves the substrate.

3. The formula for calculating the RE for nucleic acid amplification is expressed as follows:

$$RE_{NAA} = \left(1 - \frac{C_{before}}{C_{after}}\right) \times 100\%$$

where  $C_{before}$  is the DNA content before amplification, and  $C_{after}$  represents the DNA content after amplification.

## Detailed information of nucleic acid amplification:

Target: SARS-CoV-2 N gene. The sequences are shown in Table S1 [1].

The nucleic acid amplification reaction uses LAMP. LAMP is commonly used isothermal amplification technologies that rapidly detect target nucleic acids using LAMP-specific primers and strand-displacement DNA polymerase.

### Reagents:

1. WarmStart Multipurpose LAMP/RT-LAMP 2X Master Mix with UDG (NEB #M1708) (consisting of Bst 2.0 WarmStart DNA Polymerase, Isothermal Amplification Buffer, MgSO<sub>4</sub>, and dNTP mix) (New England Biolab USA)

2. 50X LAMP fluorescent dye (B1700SVIAL) for fluorescence measurements. (New England Biolab USA)

Fluorescent probe (P): For the detection of SARS-CoV-2 N gene, FAM-labeled probe was used. FAM (Carboxyfluorescein) is a fluorescent compound with an excitation peak at 493 nm and an emission peak at 517 nm.

3. LAMP Primer: forward inner primer (FIP), backward inner primer (BIP), forward loop primer (LF), backward loop primer (LB), forward outer primer (F3), and backward outer primer (B3) (IDT, USA) [2].

Table S1. Target (SARS-CoV-2 N gene) fragment sequences [1]:

|                |                         |                                                                                                                                                                                                                                                                                                                                                                                                                                                                                                                                                                                                                                                                                                                                                                                                                                                                                                                          |
|----------------|-------------------------|--------------------------------------------------------------------------------------------------------------------------------------------------------------------------------------------------------------------------------------------------------------------------------------------------------------------------------------------------------------------------------------------------------------------------------------------------------------------------------------------------------------------------------------------------------------------------------------------------------------------------------------------------------------------------------------------------------------------------------------------------------------------------------------------------------------------------------------------------------------------------------------------------------------------------|
| SARS-<br>CoV-2 | <i>N</i><br><i>gene</i> | AUGUCUGAUAUAUGGACCCCAAAAUCAGCGAAAUGCACCCCGCA<br>UUACGUUUGGUGGACCCUCAGAUUCAACUGGCAGUAACCAGAA<br>UGGAGAACGCAGUGGGGCGCGAUAACAACAACGUCGGCCCCAA<br>GGUUUACCCAAUAUAUCUGCGUCUUGGUUCACCGCUCUCACUC<br>AACAUUGGCAGAUACCAAAUUGGCUACUACCGAAGAGCUACCA<br>GACGAAUUCGUGGUGGUGACGGUAAAUGAAAGAUCUCAGUCC<br>AAGAUGGUAUUUCUACUACCUAGGAACUGGGCCAGAAGCUGGA<br>CUUCCCUAUGGUGCUAACAAGACGGCAUCAUAUGGGUUGCAA<br>CUGAGGGAGCCUUGAAUACACCAAAAGAUCACAUUGGCACCCG<br>CAAUCCUGCUAACA AUGCUGCAAUCGUGCUACAACUCCUCA<br>GGAACAACAUUGCCAAAAGGCUUCUACGCAGAAGGGAGCAGAG<br>GCGGCAGUCAAGCCUCUUCUCGUUCCUCAUCACGUAGUCGCAAC<br>AGUUCAAGAAAUUCAACUCCAGGCAGCAGUAGGGGAACUUCUC<br>CUGCUAGAAUGGCUGGCAAUGGCGGUGAUGCUGCUCUUGCUUU<br>GCUGCUGCUUGACAGAUUGAACCAGCUUGAGAGCAAAAUGUCU<br>GGUAAAAGGCCAACAACAACAAGGCCAACUGUCACUAAGAAAU<br>CUGCUGCUGAGGCUUCUAAGAAGCCUCGGCAAAAACGUACUGC<br>CACUAAAAGCAUACAAUGUAACACAAGCUUUCGGCAGACGUGGU<br>CCAGAACAACCCAAGGAAAUUUUGGGGACCAGGAACUAAUCA |
|----------------|-------------------------|--------------------------------------------------------------------------------------------------------------------------------------------------------------------------------------------------------------------------------------------------------------------------------------------------------------------------------------------------------------------------------------------------------------------------------------------------------------------------------------------------------------------------------------------------------------------------------------------------------------------------------------------------------------------------------------------------------------------------------------------------------------------------------------------------------------------------------------------------------------------------------------------------------------------------|



GACAAGGAACUGAUUACAAACAUUGGCCGCAAUUGCACAAUU  
UGCCCCCAGCGCUUCAGCGUUCUUCGGAAUGUCGCGCAUUGGC  
AUGGAAGUCACACCUUCGGGAACGUGGUUGACCUACACAGGUG  
CCAUCAAAUUGGAUGACAAAGAUCCAAUUUCAAGAUAAGU  
CAUUUUGCUGAAUAAGCAUAUUGACGCAUACAAAACAUCCCA  
CCAACAGAGCCUAAAAAGGACAAAAGAAGAAGGCUGAUGAAA  
CUCAAGCCUUACCGCAGAGACAGAAGAAACAGCAAACUGUGAC  
UCUUCUCCUGCUGCAGAUUUGGAUGAUUUCUCCAAACA AUUG  
CAACAAUCCAUGAGCAGUGCUGACUCAACUCAGGCCUAA

## References

- [1] J. Talap, M. Shen, L. Yu, S. Zeng, and S. Cai, *Talanta.*, 2022, 248 , 123644.
- [2] J. P. Broughton , X. Deng , G. Yu , C. L. Fasching , V. Servellita , J. Singh , X. Miao , J. A. Streithorst , A. Granados and A. Sotomayor-Gonzalez , *Nat. Biotechnol.*, 2020, 38 , 870-874.
